# Supplementary material
Source: PubMed Central journal article supplement (PMC8139005)
Supplement: 43058_2021_154_MOESM2_ESM.pdf [file 43058_2021_154_MOESM2_ESM.pdf]

SOCIAL SCIENCES & HUMANITIES INTERDIVISIONAL RESEARCH ETHICS COMMITTEE

Research Services, University of Oxford, Wellington Square, Oxford OX1 2JD  
Tel: +44(0)1865 616576 Fax: +44(0)1865 280467  
[ethics@socsci.ox.ac.uk](mailto:ethics@socsci.ox.ac.uk)

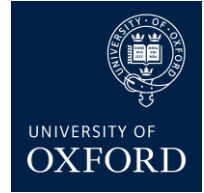

11 September 2020

Dr Jamie Lachman  
Department of Social Policy and Intervention

Dear Jamie

**Research Ethics Approval (CUREC 2)**

**Ref No:** R64777/RE001

**Title:** Furaha Adolescent Implementation Research (FAIR) Study

The above application has been considered on behalf of the Social Sciences and Humanities Interdivisional Research Ethics Committee (IDREC) in accordance with the procedures laid down by the University for ethical approval of all research involving human participants.

I am pleased to inform you that, on the basis of the information provided to the IDREC, the proposed research has been judged as meeting appropriate ethical standards, and accordingly approval has been granted.

Should there be any subsequent changes to the project that raise ethical issues not covered in the original application you should submit details to the IDREC for consideration:

<https://researchsupport.admin.ox.ac.uk/governance/ethics/apply/sshidrec#collapse394916>.

Please note that your study may be selected for review by the SSH IDREC during an annual audit. You may also be required to submit a brief annual progress report on each anniversary of study approval, until the study is completed.

Yours sincerely,

A handwritten signature in black ink that reads 'J Blaikie'.

Jennifer Blaikie  
Research Ethics Manager

cc: Olivia Thornton
