# Supplementary material
Source: PubMed Central journal article supplement (PMC8139005)
Supplement: 43058_2021_154_MOESM3_ESM.pdf [file 43058_2021_154_MOESM3_ESM.pdf]

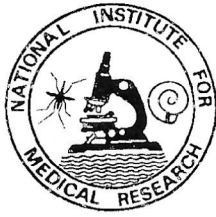

**THE UNITED REPUBLIC  
OF TANZANIA**

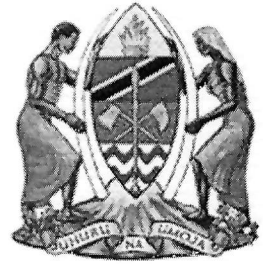

National Institute for Medical Research  
3 Barack Obama Drive  
P.O. Box 9653  
11101 Dar es Salaam  
Tel: 255 22 2121400  
Fax: 255 22 2121360  
E-mail: [nimrethics@gmail.com](mailto:nimrethics@gmail.com)

Ministry of Health, Community  
Development, Gender, Elderly & Children  
University of Dodoma, College of  
Business Studies and Law  
Building No. 11  
P.O. Box 743  
40478 Dodoma

NIMR/HQ/R.8a/Vol. IX/3459

30<sup>th</sup> June 2020

Dr Joyce Wamoyi  
Principal Research Scientist  
National Institute for Medical Research - Mwanza Centre  
P O BOX 1462  
Mwanza

**RE: ETHICAL CLEARANCE CERTIFICATE FOR CONDUCTING  
MEDICAL RESEARCH IN TANZANIA**

This is to certify that the research entitled: Furaha Adolescent Implementation Research Study (FAIR) (Wamoyi J. et al), has been granted ethical clearance to be conducted in Tanzania.

The Principal Investigator of the study must ensure that the following conditions are fulfilled:

1. Progress report is submitted to the Ministry of Health, Community Development, Gender, Elderly & Children and the National Institute for Medical Research, Regional and District Medical Officers after every six months.
2. Permission to publish the results is obtained from National Institute for Medical Research.
3. Copies of final publications are made available to the Ministry of Health, Community Development, Gender, Elderly & Children and the National Institute for Medical Research.
4. Any researcher, who contravenes or fails to comply with these conditions, shall be guilty of an offence and shall be liable on conviction to a fine as per NIMR Act No. 23 of 1979, PART III Section 10(2).
5. Sites: Kagera, Mbeya and Shinyanga regions.

Approval is valid for one year. 30<sup>th</sup> June 2020 to 29<sup>th</sup> June 2021.

Name: Prof. Yunus Daud Mgya

Name: Prof. Abel Nkono Makubi

  
Signature  
CHAIRPERSON  
MEDICAL RESEARCH  
COORDINATING COMMITTEE

  
Signature  
CHIEF MEDICAL OFFICER  
MINISTRY OF HEALTH, COMMUNITY  
DEVELOPMENT, GENDER, ELDERLY &  
CHILDREN

CC: Director, Health Services-TAMISEMI, Dodoma  
RMO of Kagera, Mbeya and Shinyanga regions.  
DMO/DED of respective districts.
