# Supplementary material
Source: PubMed Central journal article supplement (PMC8139005)
Supplement: 43058_2021_154_MOESM4_ESM.pdf [file 43058_2021_154_MOESM4_ESM.pdf]

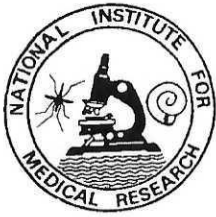

**THE UNITED REPUBLIC  
OF TANZANIA**

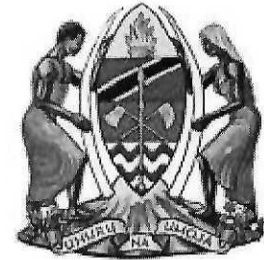

National Institute for Medical Research  
3 Barack Obama Drive  
P.O. Box 965  
11101 Dar es Salaam  
Tel: 255 22 2121400  
Fax: 255 22 2121360  
E-mail: [nimrethics@gmail.com](mailto:nimrethics@gmail.com)

Permanent Secretary (Health)  
Ministry of Health, Community  
Development, Gender, Elderly and  
Children  
Government City Mtumba, Health Road  
P.O. Box 743  
40478 Dodoma

NIMR/HQ/R.8c/Vol. I/876

16<sup>th</sup> December, 2020

Dr. Joyce Wamoyi  
Principal Research Scientist  
National Institute for Medical Research – Mwanza Centre  
P.O.BOX 1462  
Mwanza.

**RE: ETHICAL APPROVAL FOR PROTOCOL AMENDMENT**

This letter is to confirm that your application for amendment of a protocol on the study entitled: Furaha adolescent implementation research study (FAIR) (Wamoyi J. et al) with ref. NIMR/HQ/R.8a/Vol. IX/3459, dated 30<sup>th</sup> June, 2020 has been granted ethical clearance to be conducted in Tanzania.

Approval is for the following amendments:

1. Addition of the following documents to the protocol:
  - Cost data collection tool
  - Research team safety protocol
  - Supervision session observation form
  - Coach and facilitator assessment survey tools (2)
  - Facilitator demographic survey
  - Group attendance register

Approval is valid until 29<sup>th</sup> June, 2021.

**Name: Prof. Yunus Daud Mgaya**

  
Signature

**CHAIRPERSON  
MEDICAL RESEARCH  
COORDINATING COMMITTEE**

**Name: Prof. Abel Nkono Makubi**

  
Signature

**CHIEF MEDICAL OFFICER  
MINISTRY OF HEALTH, COMMUNITY  
DEVELOPMENT, GENDER, ELDERLY &  
CHILDREN**
