# Supplementary material
Source: PubMed Central journal article supplement (PMC8139005)
Supplement: 43058_2021_154_MOESM5_ESM.pdf [file 43058_2021_154_MOESM5_ESM.pdf]

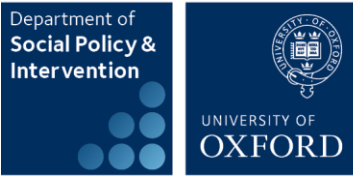

Barnett House, 32 Wellington Square,  
Oxford, OX1 2ER, United Kingdom  
[www.spi.ox.ac.uk](http://www.spi.ox.ac.uk)

Professor Lucie Cluver  
Department of Social Policy and Intervention  
University of Oxford

SPICUREC1a\_\_20\_015

30<sup>th</sup> July 2020

Dear Lucie,

**Parenting for Lifelong Health: Scale-Up of Parenting Evaluation Research (PLH-SUPER)**

Your application for research ethics approval in connection with your research project has been considered by the Departmental Research Ethics Committee (DREC) in accordance with the procedures laid down by the University for Ethical Approval.

I am pleased to inform you that, on the basis of the information provided, the proposed research has been judged as meeting appropriate ethical standards and DREC approval has been granted.

If any revisions to your research methodology are made subsequent to this approval, these must be detailed in writing and submitted to DREC immediately.

Yours sincerely,

A handwritten signature in cursive script that reads 'Jane Barlow'.

Professor Jane Barlow  
Research Director and Acting Chair of DREC
