# Supplementary material
Source: PubMed Central journal article supplement (PMC8139005)
Supplement: 43058_2021_154_MOESM6_ESM.pdf [file 43058_2021_154_MOESM6_ESM.pdf]

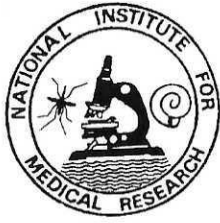

**THE UNITED REPUBLIC  
OF TANZANIA**

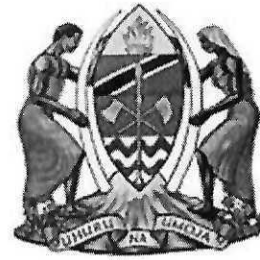

National Institute for Medical Research  
3 Barack Obama Drive  
P.O. Box 9653  
11101 Dar es Salaam  
Tel: 255 22 2121400  
Fax: 255 22 2121360  
Email: [nimrethics@gmail.com](mailto:nimrethics@gmail.com)

Permanent Secretary (Health)  
Ministry of Health, Community  
Development, Gender, Elderly & Children  
Government City Mtumba, Health Road  
P.O. Box 743  
40478 Dodoma

NIMR/HQ/R.8c/Vol. I/1634

11<sup>th</sup> December, 2020

Dr. Amon Exavery  
Pact Tanzania  
C/o Dr. Naftali Ng'ondi  
MoHCDGEC  
P O Box 32652  
Dar es Salaam

**RE: APPROVAL FOR EXTENSION OF ETHICAL CLEARANCE**

This letter is to confirm that your application for extension on the already approved proposal: Inspiring an evidence-base for parenting programmes to end child abuse: including Tanzania data in a multi-country secondary analysis (Exavery A. et al) whose local investigator is Dr. Naftali Ng'ondi of MoHCDGEC, has been approved.

The extension approval is based on the progress report dated 18<sup>th</sup> December, 2020 on the project, Ref. NIMR/HQ/R.8a/Vol. IX/2902, dated 03<sup>rd</sup> October, 2018. Extension approval is valid until 02<sup>nd</sup> October, 2021.

The Principal Investigator must ensure that other conditions of approval remain as per ethical clearance letter. The PI should ensure that progress and final reports are submitted in a timely manner.

**Name: Prof. Yunus Daud Mgaya**

Signature  
CHAIRPERSON  
MEDICAL RESEARCH  
COORDINATING COMMITTEE

**Name: Prof. Abel Nkono Makubi**

Signature  
CHIEF MEDICAL OFFICER  
MINISTRY OF HEALTH, COMMUNITY  
DEVELOPMENT, GENDER, ELDERLY  
& CHILDREN
